# Supplementary material for: Solid state forms of 4-aminoquinaldine – from void structures with and without solvent inclusion to close packing
Source: Royal Society of Chemistry journal article supplement (doi:10.1039/c5ce00118h), 2015-01-01
Supplement: c5ce00118h1.pdf [file c5ce00118h1.pdf]

# Solid state forms of 4-aminoquinoline - From void structures with and without solvent inclusion to close packing

Doris E. Braun, Thomas Gelbrich, Volker Kahlenberg and Ulrich J. Griesser

## Electronic Supplementary Information

### Contents of Supplementary Information

|            |                                                                                          |    |
|------------|------------------------------------------------------------------------------------------|----|
| <b>1</b>   | <b>Experimental Screening and Characterisation of 4-AQ Anhydrates and Solvates</b> ..... | 2  |
| <b>1.1</b> | <b>Solid Form Screen</b> .....                                                           | 2  |
| 1.1.1.     | <i>Evaporative Crystallisation</i> .....                                                 | 2  |
| 1.1.2.     | <i>Cooling Crystallisation</i> .....                                                     | 4  |
| 1.1.3.     | <i>Antisolvent Addition Crystallisation</i> .....                                        | 5  |
| 1.1.4.     | <i>Liquid Assisted Grinding (LAG) Experiments</i> .....                                  | 6  |
| <b>1.2</b> | <b>Characterisation of 4-AQ Anhydrates and Carbon Tetrachloride Solvate</b> .....        | 7  |
| 1.2.1.     | <i>Anhydrate I<sup>o</sup></i> .....                                                     | 7  |
| 1.2.2.     | <i>Anhydrate II</i> .....                                                                | 7  |
| 1.2.3.     | <i>Anhydrate III</i> .....                                                               | 12 |
| 1.2.3.     | <i>Carbon Tetrachloride Solvate</i> .....                                                | 13 |
| <b>1.3</b> | <b>Thermodynamic Stability - Semi-schematic Energy/Temperature Diagram</b> .....         | 14 |
| <b>2</b>   | <b>Computational Search for Anhydrate Polymorphs</b> .....                               | 15 |
| <b>2.1</b> | <b>Conformational Analysis of 4-Amino-2-methylquinoline</b> .....                        | 15 |
| <b>2.2</b> | <b>Computational Generation of the Crystal Energy Landscape</b> .....                    | 16 |
| 2.2.1.     | <i>Space groups</i> .....                                                                | 16 |
| 2.2.2.     | <i>DFT-D Calculations: Methodology</i> .....                                             | 16 |
| 2.2.3.     | <i>Lowest Energy Structures (CrystalOptimizer and PBE-D)</i> .....                       | 17 |
| <b>2.3</b> | <b>Representation of the Experimental Structures</b> .....                               | 20 |
| <b>2.4</b> | <b>PIXEL Calculations</b> .....                                                          | 22 |
| <b>2.5</b> | <b>Hirshfeld Surfaces</b> .....                                                          | 23 |
| <b>2.6</b> | <b>Computationally Generated AH III Structure</b> .....                                  | 24 |

## 1 Experimental Screening and Characterisation of 4-AQ Anhydrates and Solvates

### 1.1 Solid Form Screen

The solid form screen encompassed a solvent crystallisation screen, thermal screening and desolvation studies. Solvent evaporation, cooling crystallisation, anti-solvent addition and liquid assisted grinding experiments were employed for the solvent screen.

#### *1.1.1. Evaporative Crystallisation*

The evaporative crystallisation screen was designed from 28 pure solvents. **4-AQ** (5–10 mg compound) was dissolved in 0.5–20 mL solvent at room temperature, then filtered either into a watch glass or vial. Vials were left open or closed with perforated caps and stored at room temperature or for faster evaporation in a drying oven at 40 °C. Residues were analysed with IR or XRPD.

The results of the evaporative crystallisation screen are summarised in Table S1. The monohydrate (**MH**) / mixture of **MH** and **AH I**<sup>o</sup> (anhydrate) was observed in the vast majority evaporation experiments at room temperature and **AH I**<sup>o</sup> at 40 °C. Additional forms, i.e. carbon tetrachloride solvate, **AH II** containing residual solvent and **AH III** were found. From dimethyl formamide and dimethyl sulfoxide a different compound crystallised at 40 °C. The latter was not further characterised.

**Table S1.** Summary of evaporative 4-AQ crystallisation experiments (WG – watch glass, oV – open vial, pV – perforated vial).

| Solvent              | WG (RT) <sup>a</sup>  | oV (RT) <sup>a</sup> | pV (RT) <sup>a</sup> | WG (40 °C) <sup>a</sup>  | oV (40 °C) <sup>a</sup>             | pV (40 °C) <sup>a</sup>             |
|----------------------|-----------------------|----------------------|----------------------|--------------------------|-------------------------------------|-------------------------------------|
| Methanol             | □                     | –                    | –                    | –                        | –                                   | –                                   |
| Ethanol              | □ > ○                 | –                    | –                    | –                        | –                                   | –                                   |
| 1-Propanol           | □ > ○                 | □                    | □                    | ○                        | ○                                   | ○                                   |
| 2-Propanol           | □ > ○                 | □                    | □                    | ○                        | ○                                   | ○                                   |
| 1-Butanol            | □+○                   | □                    | □                    | ○                        | ○+◇                                 | ○+◇                                 |
| 2-Butanol            | □                     | □                    | □                    | ○                        | ○                                   | ○                                   |
| 1-Pentanol           | □+○                   | □                    | □                    | ○                        | ○                                   | ○                                   |
| 2-Pentanol           | □                     | □                    | □                    | ○                        | ○                                   | ○                                   |
| t-Pentanol           | □+○                   | □                    | □                    | ○                        | ○                                   | ○                                   |
| Acetone              | □                     | –                    | –                    | –                        | –                                   | –                                   |
| Acetonitrile         | □+○                   | –                    | –                    | –                        | –                                   | –                                   |
| Dimethyl formamide   | □+○                   | –                    | –                    | diff. cpd                | –                                   | –                                   |
| Dimethyl sulfoxide   | □                     | –                    | –                    | diff. cpd                | –                                   | –                                   |
| Dichloromethane      | □+○                   | □+○                  | □+○                  | ○                        | ○                                   | ○                                   |
| Dichloroethane       | □+○                   | □+○                  | □+○                  | ○                        | ○                                   | ○                                   |
| Chloroform           | ○+◇                   | □+○                  | □+○                  | ○                        | ○                                   | ○                                   |
| Carbon tetrachloride | X(SCCl <sub>4</sub> ) | SCCl <sub>4</sub>    | SCCl <sub>4</sub>    | ○+ X(SCCl <sub>4</sub> ) | ◇<br>SCCl <sub>4</sub> <sup>b</sup> | ◇<br>SCCl <sub>4</sub> <sup>b</sup> |
| 1,4-Dioxane          | □+○                   | –                    | –                    | –                        | –                                   | –                                   |
| Methyl acetate       | □+○                   | –                    | –                    | –                        | –                                   | –                                   |
| Ethyl acetate        | □+○                   | –                    | –                    | –                        | –                                   | –                                   |
| Diethyl ether        | □+○                   | –                    | –                    | –                        | –                                   | –                                   |
| Ethyl methyl ketone  | ○                     | –                    | –                    | –                        | –                                   | –                                   |
| Nitromethane         | ○+am                  | –                    | –                    | –                        | –                                   | –                                   |
| Pyridine             | □                     | –                    | –                    | –                        | –                                   | –                                   |
| Tetrahydrofurane     | □+○                   | □+○                  | □                    | ○+◇                      | ○+◇                                 | ○+◇                                 |
| Toluene              | □+○                   |                      |                      |                          |                                     |                                     |
| Xylene               | ○                     |                      |                      |                          |                                     |                                     |
| Water                | □                     |                      |                      |                          |                                     |                                     |

<sup>a</sup>□ = MH, ○ = AH I°, ◇ = AH II containing residual solvent, X = AH III, am = amorphous, SCCl<sub>4</sub> = carbon tetrachloride solvate, diff. cpd – different compound. <sup>b</sup>Solution saturated at 75 °C.

### 1.1.2. Cooling Crystallisation

The cooling crystallisation screen was designed from 26 pure and seven mixed solvents. Suspensions of **4-AQ** (10–25 mg in 0.5–20 mL solvents) were heated to the boiling point of the solvent, then filtered into vials. The vials were closed and cooled to room temperature (vial wrapped in Al foil) or 8 °C (refrigerator). The solid product was analysed with IR or XRPD (Table S2). **MH**, **AH I°**, and the carbon tetrachloride solvate (**S<sub>CCl4</sub>**) were obtained.

**Table S2.** Summary of **4-AQ** cooling crystallisation experiments.

| Solvent              | RT (slow) <sup>a</sup>  | 8 °C (fast) <sup>a</sup> | Solvent(s)                 | RT (slow) <sup>a</sup> | 8 °C (fast) <sup>a</sup> |
|----------------------|-------------------------|--------------------------|----------------------------|------------------------|--------------------------|
| Methanol             | ○                       | □                        | Water + methanol (1:1)     | □                      | □                        |
| Ethanol              | □                       | □                        | Water + ethanol (1:1)      | □                      | □                        |
| 1-Propanol           | □                       | □                        | Water + 1-propanol (1:1)   | □                      | □                        |
| 2-Propanol           | □                       | □                        | Water + 2-propanol (1:1)   | □                      | □                        |
| 1-Butanol            | □                       | □                        | –                          | –                      | –                        |
| 2-Butanol            | □                       | □                        | –                          | –                      | –                        |
| 1-Pentanol           | □                       | □                        | –                          | –                      | –                        |
| 2-Pentanol           | □                       | □                        | –                          | –                      | –                        |
| t-Pentanol           | □                       | □                        | –                          | –                      | –                        |
| Acetone              | □                       | □                        | Water + acetone (1:1)      | □                      | □                        |
| Acetonitrile         | ○                       | □+○                      | Water + acetonitrile (1:1) | □                      | □                        |
| Dichloromethane      | ○                       | □                        | –                          | –                      | –                        |
| Dichloroethane       | ○                       | □+○                      | –                          | –                      | –                        |
| Chloroform           | ○                       | □+○                      | –                          | –                      | –                        |
| Carbon tetrachloride | <b>S<sub>CCl4</sub></b> | <b>S<sub>CCl4</sub></b>  | –                          | –                      | –                        |
| Dioxane              | □+○                     | □+○                      | Water + dioxane (1:1)      | □                      | □                        |
| Methyl acetate       | □                       | □                        | –                          | –                      | –                        |
| Ethyl acetate        | ○                       | □                        | –                          | –                      | –                        |
| Diethyl ether        | ○                       | □                        | –                          | –                      | –                        |
| Ethyl methyl ketone  | □+○                     | □+○                      | –                          | –                      | –                        |
| Nitromethane         | ○                       | ○                        | –                          | –                      | –                        |
| Pyridine             | □                       | □                        | –                          | –                      | –                        |
| Tetrahydrofuran      | ○                       | □+○                      | –                          | –                      | –                        |
| Toluene              | ○                       | □                        | –                          | –                      | –                        |
| Xylene               | ○                       | □                        | –                          | –                      | –                        |
| Water                | □                       | □                        | –                          | –                      | –                        |

<sup>a</sup>□ = **MH**, ○ = **AH I°**, **S<sub>CCl4</sub>** = carbon tetrachloride solvate. RT (slow) – vial wrapped in Al foil, 8 °C (fast) – vial stored in refrigerator.

### 1.1.3. Antisolvent Addition Crystallisation

The antisolvent addition crystallisation screen was designed from 32 mixed solvent systems. **4-AQ** and solvents were dispensed at room temperature in various amounts, then filtered. Antisolvent was added drop-wise until either persistent clouding was observed or the maximum antisolvent volume (three times the volume of the solvent) was dispensed. Solid products were analysed with IR.

The results of the antisolvent addition crystallisation screen are summarised in Table S3. **MH** and **AH I<sup>o</sup>** were obtained as the crystallisation products.

**Table S3.** Summary of **4-AQ** antisolvent addition crystallisation experiments.

| Solvent              | Antisolvent | Solid Form <sup>a</sup> | Antisolvent | Solid Form <sup>a</sup> |
|----------------------|-------------|-------------------------|-------------|-------------------------|
| Methanol             | Toluene     | ○                       | Water       | □                       |
| Ethanol              | Toluene     | □+○                     | Water       | □                       |
| 1-Propanol           | Toluene     | ○                       | Water       | □                       |
| 2-Propanol           | Toluene     | □                       | Water       | □                       |
| 1-Butanol            | Toluene     | □                       | –           | –                       |
| 2-Butanol            | Toluene     | □                       | –           | –                       |
| Acetone              | Toluene     | □                       | Water       | □                       |
| Acetonitrile         | Toluene     | ○                       | Water       | □                       |
| Dimethyl formamide   | Toluene     | □                       | Water       | □                       |
| Dimethyl sulfoxide   | Toluene     | □                       | Water       | □                       |
| Dichloromethane      | Toluene     | ○                       | –           | –                       |
| Dichloroethane       | Toluene     | ○                       | –           | –                       |
| Chloroform           | Toluene     | ○                       | –           | –                       |
| Carbon tetrachloride | Toluene     | ○                       | –           | –                       |
| Dioxane              | Toluene     | ○                       | Water       | □                       |
| Methyl acetate       | Toluene     | ○                       | –           | –                       |
| Ethyl acetate        | Toluene     | ○                       | –           | –                       |
| Diethyl ether        | Toluene     | ○                       | –           | –                       |
| Ethyl methyl ketone  | Toluene     | □+○                     | –           | –                       |
| Nitromethane         | Toluene     | ○                       | –           | –                       |
| Pyridine             | Toluene     | □                       | –           | –                       |
| Tetrahydrofuran      | Toluene     | ○                       | Water       | □                       |

<sup>a</sup>□ = MH, ○ = AH I<sup>o</sup>

#### 1.1.4. Liquid Assisted Grinding (LAG) Experiments

15–20 mg of **4-AQ** and few drops of solvent were ground in a Retsch grinding mill MM301 for 10 minutes. The wet product was analysed with XRPD. The results are summarised in Table S4. Only **MH** and **AH I°** were obtained in the LAG experiments.

**Table S4.** Summary of **4-AQ** liquid assisted grinding experiments.

| Solvent            | Solid Form <sup>a</sup> | Solvent              | Solid Form <sup>a</sup> |
|--------------------|-------------------------|----------------------|-------------------------|
| Methanol           | □                       | Carbon tetrachloride | ○                       |
| Ethanol            | □+○                     | Dioxane              | ○                       |
| 1-Propanol         | ○                       | Methyl acetate       | ○                       |
| 2-Propanol         | ○                       | Ethyl acetate        | ○                       |
| 1-Butanol          | ○                       | Diethyl ether        | ○                       |
| 2-Butanol          | ○                       | Ethyl methyl ketone  | ○                       |
| 1-Pentanol         | ○                       | Nitromethane         | ○                       |
| 2-Pentanol         | ○                       | Pyridine             | ○                       |
| t-Pentanol         | ○                       | Tetrahydrofuran      | ○                       |
| Acetone            | ○                       | Toluene              | ○                       |
| Acetonitrile       | ○                       | Xylene               | ○                       |
| Dimethyl formamide | ○                       | Heptane              | ○                       |
| Dimethyl sulfoxide | ○                       | Water                | □                       |
| Chloroform         | ○                       | –                    | –                       |

<sup>a</sup>□ = MH , ○ = AH I°

## 1.2 Characterisation of 4-AQ Anhydrates and Carbon Tetrachloride Solvate

### 1.2.1. Anhydrate I°

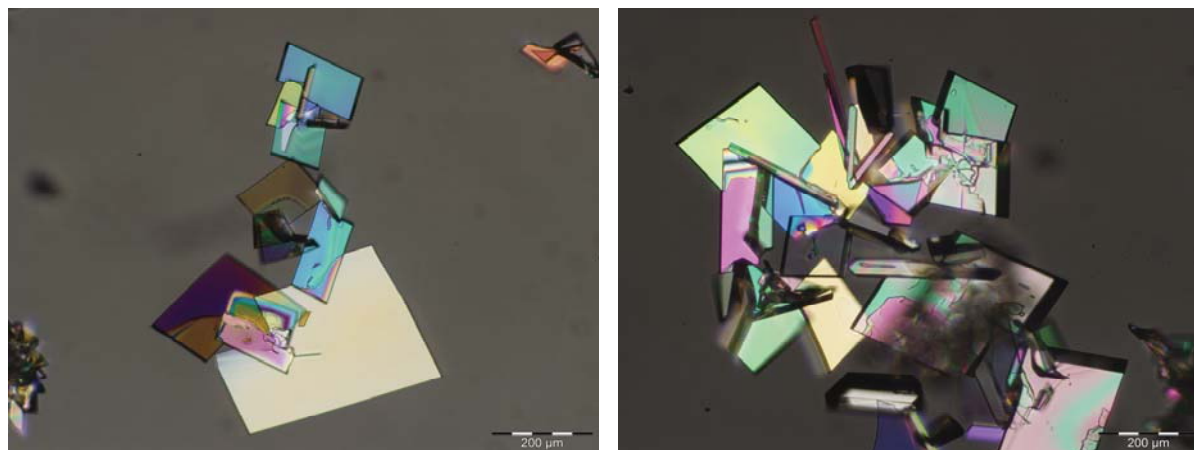

(a) 150 °C (after 15 minutes)

(b) 150 °C (after 5 hours)

**Figure S1.** AH I° single crystals obtained from sublimation experiments.

### 1.2.2. Anhydrate II

Crystallised form melt – AH II(melt):

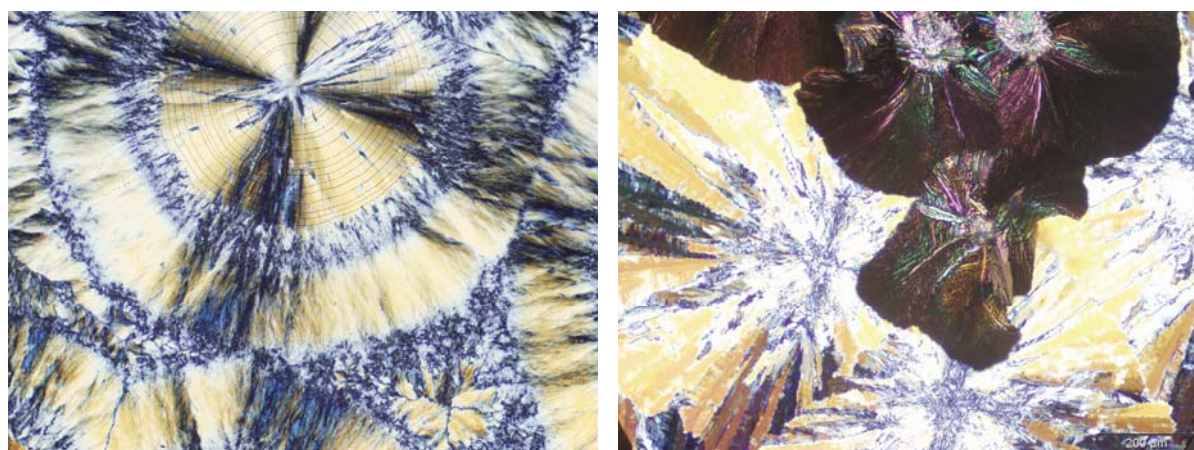

(a) AH II ( 65 °C)

(b) AH II to AH I° transformation (115 °C)

**Figure S2.** Microphotographs showing (a) AH II and (b) the AH II to AH I° phase transformation.

The diffraction pattern of **AH II**(melt) ( $2\theta$ : 2 – 45°, step size of  $2\theta = 0.007^\circ$ ) was indexed using the first twenty peaks with DICVOL04 and the space group was determined based on a statistical assessment of systematic absences,<sup>1</sup> as implemented in the DASH structure solution package.<sup>2</sup> Lattice parameters and space group corresponded to the computationally generated **AH II** structure (Fig. 8) ignoring temperature effects.

Pawley fits were performed with Topas Academic V5:<sup>3</sup>  $R\bar{3}$ ,  $a = 28.422(9)$  Å,  $c = 11.967(5)$  Å (Figure S3). The background was modelled with Chebyshev polynomials and the modified Thompson-Cox-Hastings pseudo-Voigt (TCHZ) function was used for peak shape fitting.

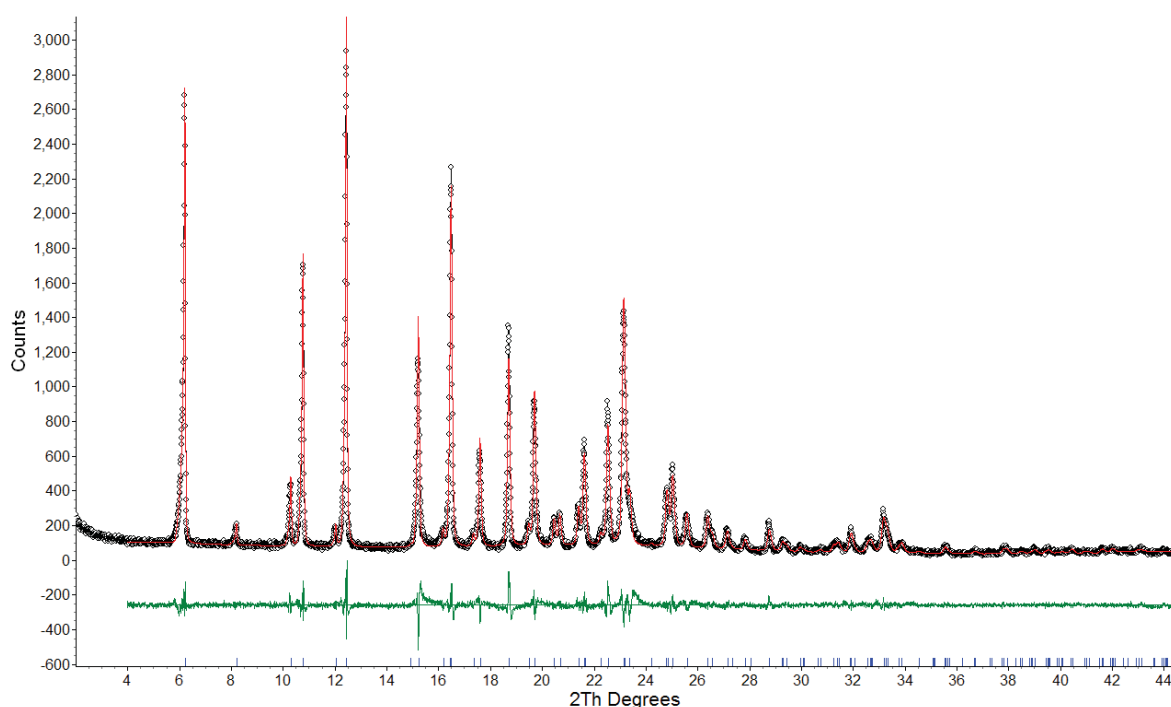

**Figure S3.** Pawley fit ( $R_{wp} = 12.32\%$ ,  $R_{exp} = 8.35\%$ ,  $R_p = 8.09\%$ ,  $gof = 1.48$ ) between the reflection XRPD data of **AH II** (melt) with a model consisting of the cell parameters derived from the computationally generated **AH II** structure (Fig. 8). Black dots indicate raw data, while the red line indicates the calculated model. Tick marks (blue) are the  $2\theta$  positions for the hkl reflections. The difference pattern is shown in green.



### Evaporation from Carbon Tetrachloride – AH II(CCl<sub>4</sub>):

The diffraction pattern of **AH II** obtained from CCl<sub>4</sub> indexed<sup>1,2</sup> to  $R\bar{3}$ ,  $a = 28.483(3) \text{ \AA}$ ,  $c = 12.002(1) \text{ \AA}$  (Figure S4). In contrast to AH II(melt) the AH II(CCl<sub>4</sub>) cell volume is increased by 0.7%, which can be related to the solvent molecules entrapped in the crystal lattice.

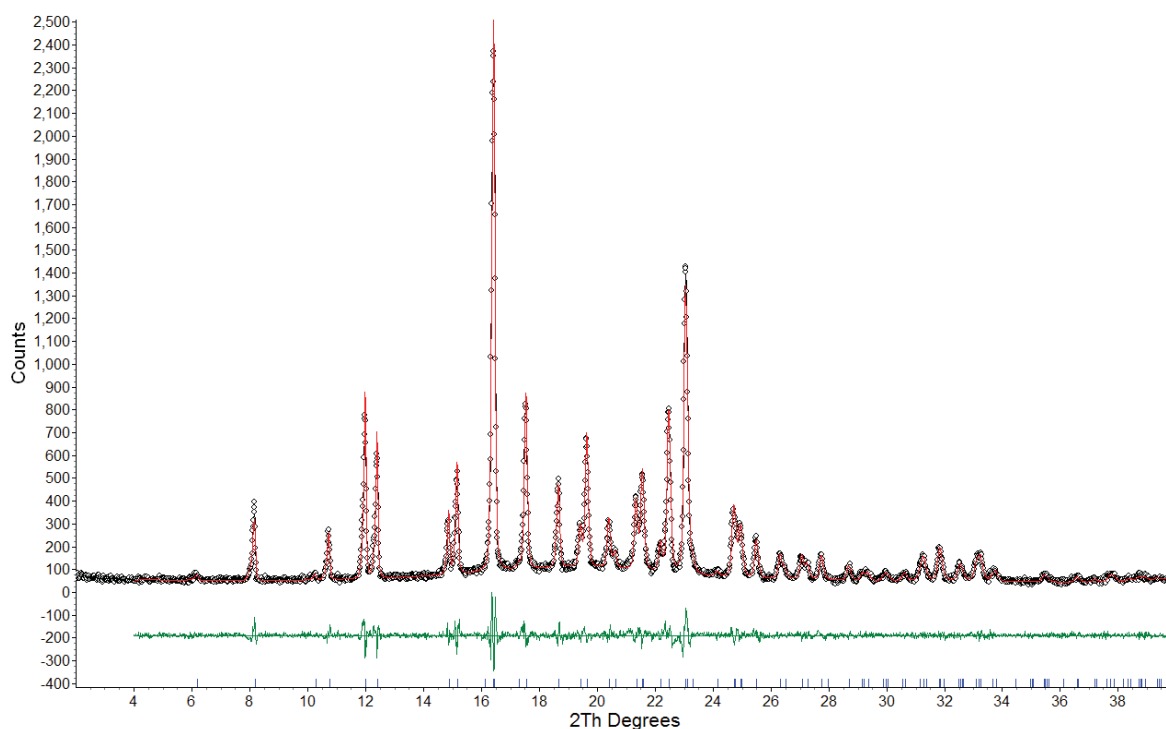

**Figure S4.** Pawley fit ( $R_{wp} = 9.33\%$ ,  $R_{exp} = 8.73\%$ ,  $R_p = 7.27\%$ ,  $gof = 1.07$ ) between the reflection XRPD data of **AH II** (CCl<sub>4</sub>) with a model consisting of the cell parameters derived from the single crystal structure **AH II**(CCl<sub>4</sub>). Black dots indicate raw data, while the red line indicates the calculated model. Tick marks (blue) are the  $2\theta$  positions for the  $hkl$  reflections. The difference pattern is shown in green.

Evaporation from Chloroform – AH II(CHCl<sub>3</sub>):

Room temperature evaporation of a at room temperature saturated **4-AQ** solution in chloroform resulted in a mixed phase, i.e. **AH I**<sup>o</sup> and **AH II(CHCl<sub>3</sub>)**. All attempts to enrich **AH II(CHCl<sub>3</sub>)** failed.

Evaporation from 1-Butanol – AH II(1BuOH):

Slow evaporation of an under-saturated solution of **4-AQ** in 1-butanol at 40 °C (solution saturated at RT) lead to **AH II(1BuOH)** or a mixture of **AH II(1BuOH)** and **AH I**<sup>o</sup>. Pawley fit, using the cell parameters derived for **AH II(CCl<sub>4</sub>)** as starting point, is given in Figure S5 ( $R\bar{3}$ ,  $a = 28.4449(8)$  Å,  $c = 11.990(15)$  Å).

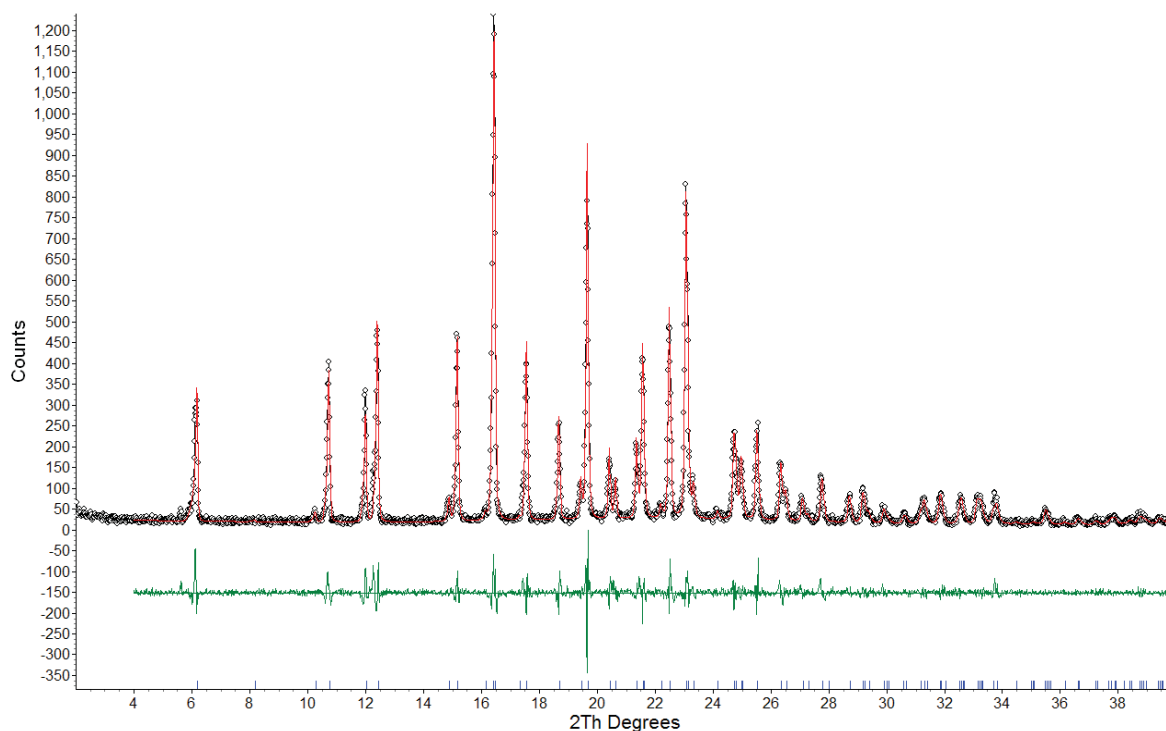

**Figure S5.** Pawley fit ( $R_{wp} = 15.06\%$ ,  $R_{exp} = 13.23\%$ ,  $R_p = 11.34\%$ ,  $gof = 1.14$ ) between the reflection XRPD data of **AH II(1BuOH)** with a model consisting of the cell parameters derived from the single crystal structure **AH II(CCl<sub>4</sub>)**. Black dots indicate raw data, while the red line indicates the calculated model. Tick marks (blue) are the  $2\theta$  positions for the hkl reflections. The difference pattern is shown in green.

Evaporation from Tetrahydrofuran – AH II(THF):

Evaporation of **4-AQ** from THF at 40 °C, using a at RT saturated solution, lead to **AH II(THF)** and **AH I°**. It was not possible to produce phase pure **AH II(THF)**. A subset of the XRPD patterns given in Fig. 3 is shown enlarged in Figure S6.

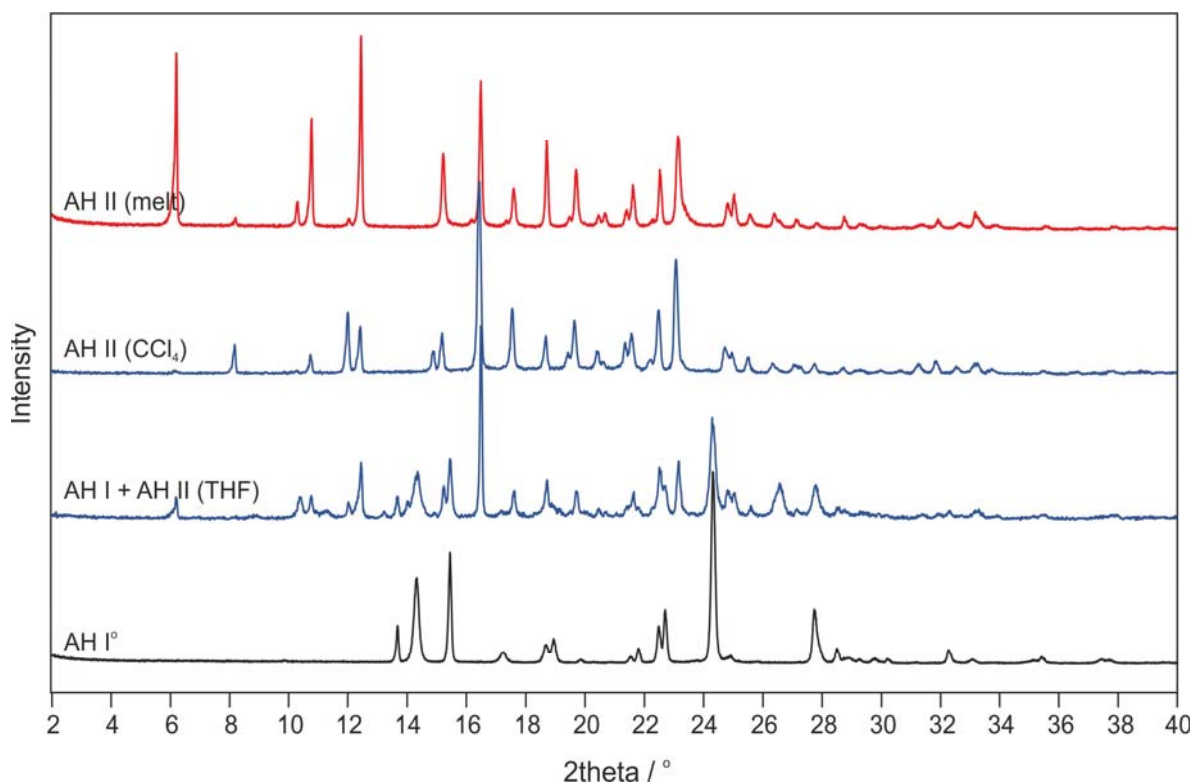

**Figure S6.** Comparison of XRPD patterns of **AH II(melt)**, **AH II(CCl<sub>4</sub>)**, mixture of **AH II(THF)** + **AH I°** and **AH I°**.

### 1.2.3. Anhydrate III

The **AH III** XRPD pattern was successfully indexed (Figure S7, Table S7):  $R\bar{3}$ ,  $a = 31.511(5)$  Å,  $c = 4.666(1)$  Å. It has to be noted that the **AH III** samples always showed traces of **AH I**<sup>o</sup>. The **AH III** lattice parameters determined at RT match the parameters of one of the computationally generated low energy structures, if temperature effects are ignored (structure 4\_10, Table S6).

The **AH III** IR spectrum (Fig. 2a) indicates the presence of a  $Z'=1$  structure, in agreement with the computationally generated structure 4\_10.

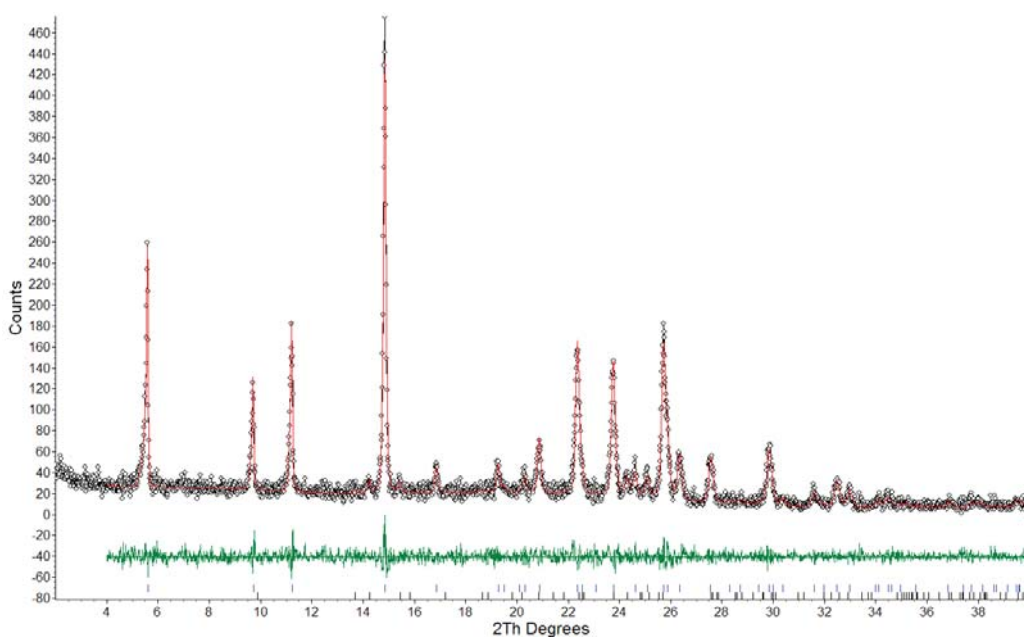

**Figure S7.** Pawley fit ( $R_{wp} = 16.54\%$ ,  $R_{exp} = 18.74\%$ ,  $R_p = 12.11\%$ ,  $gof = 0.88$ ) between the reflection XRPD data of **AH III**/**AH I**<sup>o</sup> with a model consisting of the cell parameters derived from the computationally generated structure for **AH III** and the single crystal structure **AH I**<sup>o</sup>. Black dots indicate the raw data, while the red line indicates the calculated model. Tick marks (blue) are the  $2\theta$  positions for the hkl reflections. The difference pattern is shown in green.

### 1.2.3. Carbon Tetrachloride Solvate

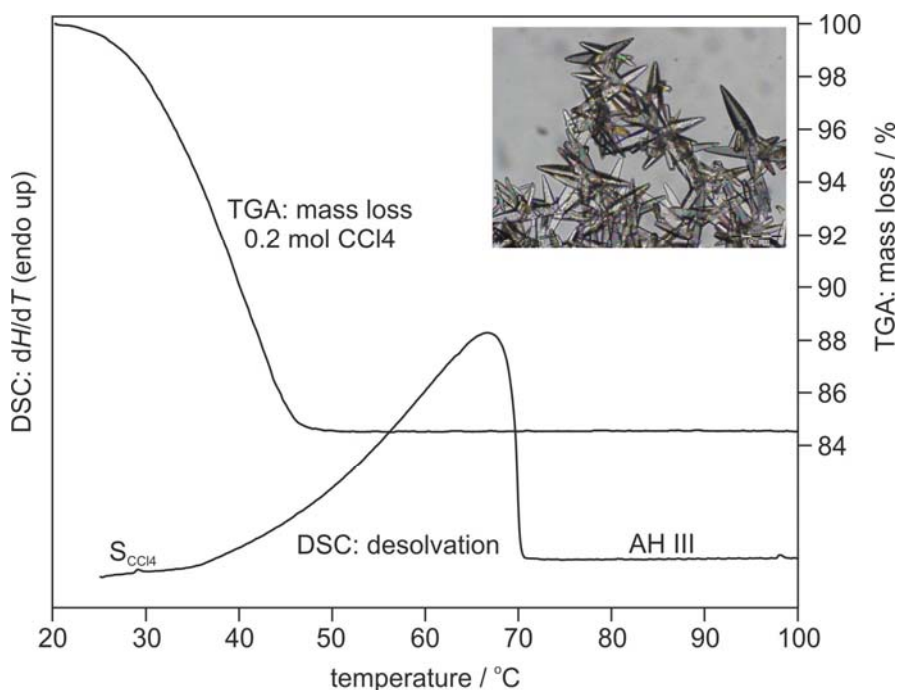

**Figure S8.** DSC and TGA thermograms of **4-AQ S<sub>CCl4</sub>**. Photograph shows S<sub>CCl4</sub> crystals in solution.

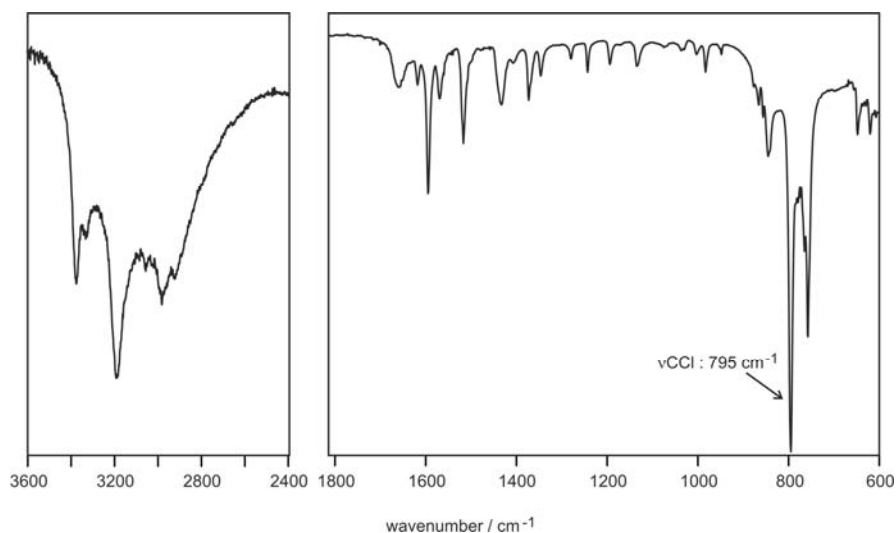

**Figure S9.** FT-IR spectra of **4-AQ S<sub>CCl4</sub>** (recorded on a ZnSe ATR crystal on a Perkin Elmer Spectrum GX Fourier Transform spectrophotometer (Perkin Elmer, Norwalk Ct., USA) over a range of 4000 to 600 cm<sup>-1</sup> with a resolution of 2 cm<sup>-1</sup> (24 scans)).

### 1.3 Thermodynamic Stability - Semi-schematic Energy/Temperature Diagram

The thermodynamic relationship of the **4-AQ** anhydrate polymorphs is displayed in a semi-schematic energy/temperature diagram (Figure S10). Polymorphic pairs **AH I°/II** and **AH I°/III** show a monotropic relationship.

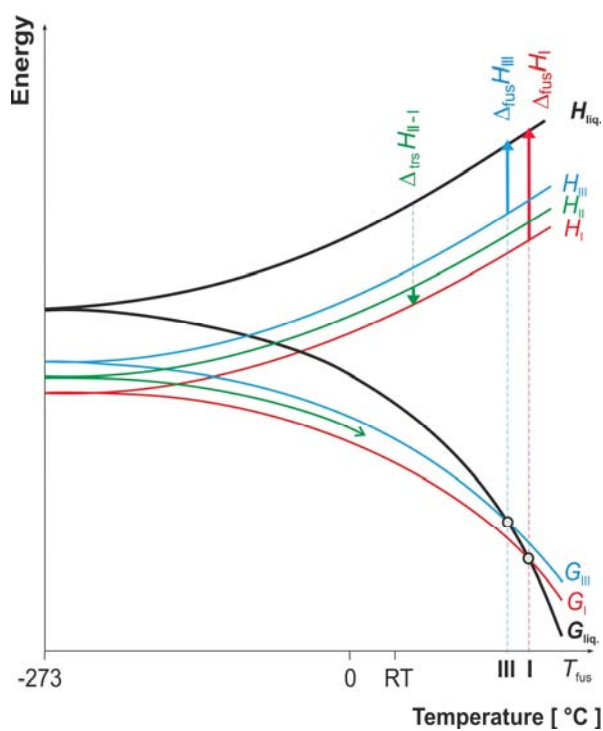

**Figure S10.** Semi-schematic energy/temperature diagram of **4-AQ** anhydrate polymorphs.  $T_{\text{fus}}$  = melting point,  $G$  = Gibbs free energy,  $H$  = enthalpy,  $\Delta_{\text{fus}}H$  = enthalpy of fusion,  $\Delta_{\text{tr<sub>s = transition enthalpy, liq.  $\Delta_{\text{fus}}H$  = liquid phase (melt).</sub>$

## 2 Computational Search for Anhydrate Polymorphs

### 2.1 Conformational Analysis of 4-Amino-2-methylquinoline

The potential energy surface scan of the **4-AQ** C3–C2–N2–H1 torsion (Figure 1), given in Figure S11, shows that there are two identical minima, separated by a significant barrier of ca. 45 kJ mol<sup>-1</sup> (calculated at the PBE0/6-31G(d,p) level of theory). In the conformational energy minimum, with the amino group modelled as planar (as opposed to pyramidal), the polar hydrogen atoms are in plane with the quinolone ring ( $\phi_1 = 0, 180, 360^\circ$ ). The amino group can move  $\pm 30^\circ$  for less than 10 kJ mol<sup>-1</sup>. In the experimental anhydrate structures (**AH I**<sup>o</sup> and **AH II**) the amino groups deviate slightly from planarity (slightly pyramidal) but are still closely related to the (planar) conformation energy minimum, as observed in the monohydrate (LOBSOL<sup>4</sup>). The energy difference between the planar and pyramidal minima was calculated as 2.6 kJ mol<sup>-1</sup> (PBE0/6-31G(d,p)).

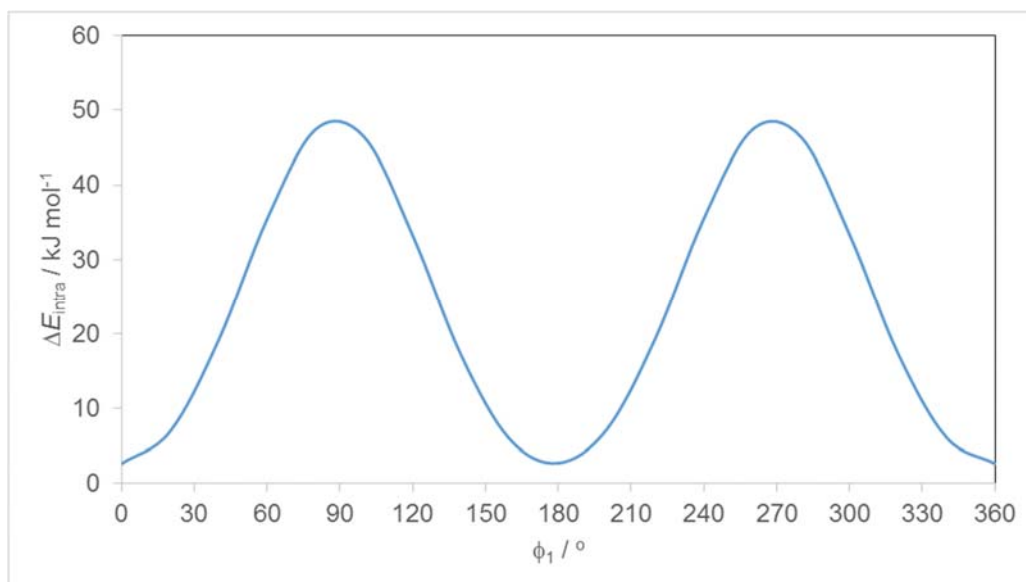

**Figure S11.** Conformational energy scan of  $\phi_1$  (C3–C2–N2–H1) for an isolated **4-AQ** molecule at PBE0/6-31G(d,p) level of theory. The amino group was modelled as planar and the rest of the molecule was optimised at each value of  $\phi_1$ , which was calculated every  $20^\circ$ .

## 2.2 Computational Generation of the Crystal Energy Landscape

### 2.2.1. Space groups

$Z'=1$  anhydrate structures were randomly generated in following 48 space groups,  $P1$ ,  $P\bar{1}$ ,  $P2_1$ ,  $P2_1/c$ ,  $P2_12_12$ ,  $P2_12_12_1$ ,  $Pna2_1$ ,  $Pca2_1$ ,  $Pbca$ ,  $Pbcn$ ,  $C2/c$ ,  $Cc$ ,  $C2$ ,  $Pc$ ,  $Cm$ ,  $P2_1/m$ ,  $C2/m$ ,  $P2/c$ ,  $C222_1$ ,  $Pmn2_1$ ,  $Fdd2$ ,  $Pnna$ ,  $Pccn$ ,  $Pbcm$ ,  $Pnmm$ ,  $Pmnm$ ,  $Pnma$ ,  $P4_1$ ,  $P4_3$ ,  $\bar{I}4$ ,  $P4/n$ ,  $P4_2/n$ ,  $I4/m$ ,  $I41/a$ ,  $P41212$ ,  $P4_32_12$ ,  $P3_1$ ,  $P3_2$ ,  $R3$ ,  $P\bar{3}$ ,  $R\bar{3}$ ,  $P3_12_1$ ,  $P322_1$ ,  $R3c$ ,  $R\bar{3}c$ ,  $P6_1$ ,  $P6_3$ ,  $P6_3/m$ .

### 2.2.2. DFT-D Calculations: Methodology

The DFT-D calculations were carried out with the CASTEP plane wave code<sup>5</sup> using the Perdew-Burke-Ernzerhof (PBE) generalised gradient approximation (GGA) exchange-correlation density functional<sup>6</sup> and ultrasoft pseudopotentials,<sup>7</sup> with the addition of a semi-empirical dispersion correction, either the Tkatchenko and Scheffler (TS) model,<sup>8</sup> or Grimme06 (G06).<sup>9</sup> In a first step, the structures were geometry optimised using the TS dispersion correction. Brillouin zone integrations were performed on a symmetrised Monkhorst–Pack  $k$ -point grid with the number of  $k$ -points chosen to provide a maximum spacing of  $0.07 \text{ \AA}^{-1}$  and a basis set cut-off of 560 eV. The self-consistent field convergence on total energy was set to  $1 \times 10^{-5}$  eV. Energy minimisations were performed using the Broyden–Fletcher–Goldfarb–Shanno optimisation scheme within the space group constraints. The optimisations were considered complete when energies were converged to better than  $2 \times 10^{-5}$  eV per atom, atomic displacements converged to  $1 \times 10^{-3} \text{ \AA}$ , maximum forces to  $5 \times 10^{-2} \text{ eV \AA}^{-1}$ , and maximum stresses were converged to  $1 \times 10^{-1}$  GPa. Energy minimisations with variable unit cells were restarted after the first minimisation to reduce the effects of changes in unit cell on the basis set. The energies for all anhydrates within  $15 \text{ kJ mol}^{-1}$  of the lowest structure were recalculated, without optimisation, with the number of  $k$ -points chosen to provide a maximum spacing of  $0.04 \text{ \AA}^{-1}$  and a basis set cut-off of 780 eV, using the G06 dispersion correction, resulting in the final crystal energy landscape (Fig. 8). Isolated molecule minimisations to compute the isolated **4-AQ** energy ( $U_{\text{gas}}$ ) were performed by placing a single molecule in a fixed cubic  $35 \times 35 \times 35 \text{ \AA}^3$  unit cell and optimised and recalculated with the same settings used for the crystal calculations.



### 2.2.3. Lowest Energy Structures (CrystalOptimizer and PBE-D)

All calculated structures are available in .res format from the authors on request. The lowest energy structures derived from CryOpt and DFT-D (PBE-TS/PBE-G06) calculations are given in Table S5 and Table S6, respectively.

**Table S5.** Hypothetical and known low-energy crystal structures of **4-AQ** (CryOpt).

| Str. ID <sup>a</sup> | Z' | Space group                                          | Cell parameters |        |        |     |        |     | E <sub>latt</sub> /<br>kJ mol <sup>-1</sup> | ΔE <sub>latt</sub> /<br>kJ mol <sup>-1</sup> | Density<br>g cm <sup>-3</sup> |
|----------------------|----|------------------------------------------------------|-----------------|--------|--------|-----|--------|-----|---------------------------------------------|----------------------------------------------|-------------------------------|
|                      |    |                                                      | a/Å             | b/Å    | c/Å    | α/° | β/°    | γ/° |                                             |                                              |                               |
| 10 (III)             | 1  | <i>R</i> $\bar{3}$                                   | 31.556          | 31.556 | 4.544  | 90  | 90     | 120 | -110.31                                     | 0.00                                         | 1.207                         |
| 160 (I)              | 1  | <i>P2</i> <sub>1</sub> / <i>c</i>                    | 5.147           | 12.565 | 12.977 | 90  | 97.94  | 90  | -110.28                                     | 0.03                                         | 1.264                         |
| 157                  | 1  | <i>P2</i> <sub>1</sub> / <i>c</i>                    | 4.791           | 14.306 | 13.500 | 90  | 115.30 | 90  | -109.69                                     | 0.62                                         | 1.256                         |
| 8                    | 1  | <i>P2</i> <sub>1</sub> / <i>c</i>                    | 5.246           | 13.343 | 12.512 | 90  | 107.88 | 90  | -109.30                                     | 1.00                                         | 1.260                         |
| 67                   | 1  | <i>R</i> $\bar{3}$                                   | 31.628          | 31.628 | 4.570  | 90  | 90     | 120 | -107.79                                     | 2.52                                         | 1.194                         |
| 2                    | 1  | <i>Pna2</i> <sub>1</sub>                             | 12.986          | 13.231 | 4.837  | 90  | 90     | 90  | -107.18                                     | 3.13                                         | 1.264                         |
| 152                  | 1  | <i>Pbca</i>                                          | 12.972          | 10.240 | 12.807 | 90  | 90     | 90  | -106.44                                     | 3.87                                         | 1.235                         |
| 16                   | 1  | <i>Pna2</i> <sub>1</sub>                             | 17.116          | 12.164 | 4.075  | 90  | 90     | 90  | -106.21                                     | 4.10                                         | 1.239                         |
| 158                  | 1  | <i>Cc</i>                                            | 4.791           | 14.583 | 12.400 | 90  | 95.92  | 90  | -105.97                                     | 4.34                                         | 1.220                         |
| 122                  | 1  | <i>Pna2</i> <sub>1</sub>                             | 15.098          | 12.016 | 4.609  | 90  | 90     | 90  | -105.41                                     | 4.89                                         | 1.257                         |
| 48                   | 1  | <i>Fdd2</i>                                          | 24.726          | 26.059 | 5.370  | 90  | 90     | 90  | -105.13                                     | 5.17                                         | 1.215                         |
| 110                  | 1  | <i>R-3</i>                                           | 31.848          | 31.848 | 4.628  | 90  | 90     | 120 | -105.11                                     | 5.20                                         | 1.163                         |
| 35                   | 1  | <i>Fdd2</i>                                          | 35.342          | 24.780 | 3.961  | 90  | 90     | 90  | -105.10                                     | 5.21                                         | 1.212                         |
| 137                  | 1  | <i>Pbca</i>                                          | 10.180          | 13.111 | 13.010 | 90  | 90     | 90  | -105.03                                     | 5.28                                         | 1.210                         |
| 19                   | 1  | <i>P2</i> <sub>1</sub> / <i>c</i>                    | 4.004           | 17.461 | 13.893 | 90  | 63.01  | 90  | -104.94                                     | 5.36                                         | 1.214                         |
| 98                   | 1  | <i>P2</i> <sub>1</sub> / <i>c</i>                    | 13.195          | 5.6528 | 12.018 | 90  | 71.19  | 90  | -104.88                                     | 5.42                                         | 1.238                         |
| 295                  | 1  | <i>P2</i> <sub>1</sub> / <i>c</i>                    | 3.984           | 17.509 | 12.506 | 90  | 82.31  | 90  | -104.86                                     | 5.45                                         | 1.215                         |
| 1026                 | 1  | <i>P2</i> <sub>1</sub> / <i>c</i>                    | 13.116          | 5.872  | 13.678 | 90  | 54.27  | 90  | -104.83                                     | 5.47                                         | 1.229                         |
| 170                  | 1  | <i>R-3</i>                                           | 24.974          | 24.974 | 8.052  | 90  | 90     | 120 | -104.71                                     | 5.60                                         | 1.087                         |
| 95                   | 1  | <i>Fdd2</i>                                          | 25.285          | 27.982 | 4.901  | 90  | 90     | 90  | -104.45                                     | 5.86                                         | 1.212                         |
| 75                   | 1  | <i>Cc</i>                                            | 12.918          | 12.049 | 5.776  | 90  | 75.15  | 90  | -103.83                                     | 6.48                                         | 1.209                         |
| 640                  | 1  | <i>P2</i> <sub>1</sub> / <i>c</i>                    | 13.026          | 6.151  | 10.834 | 90  | 93.44  | 90  | -103.50                                     | 6.81                                         | 1.213                         |
| 32                   | 1  | $\bar{3}R$                                           | 32.963          | 32.963 | 4.240  | 90  | 90     | 120 | -103.38                                     | 6.93                                         | 1.185                         |
| 229                  | 1  | <i>Pna2</i> <sub>1</sub>                             | 15.216          | 4.772  | 11.880 | 90  | 90     | 90  | -103.36                                     | 6.95                                         | 1.218                         |
| 2502                 | 1  | <i>Pna2</i> <sub>1</sub>                             | 15.074          | 11.886 | 4.797  | 90  | 90     | 90  | -103.12                                     | 7.19                                         | 1.223                         |
| 187                  | 1  | <i>Pbca</i>                                          | 5.733           | 13.249 | 22.731 | 90  | 90     | 90  | -103.06                                     | 7.25                                         | 1.217                         |
| 1012                 | 1  | <i>Pbca</i>                                          | 22.111          | 6.087  | 13.030 | 90  | 90     | 90  | -102.90                                     | 7.40                                         | 1.198                         |
| 111                  | 1  | <i>P2</i> <sub>1</sub> / <i>c</i>                    | 4.205           | 16.764 | 12.539 | 90  | 85.57  | 90  | -102.66                                     | 7.64                                         | 1.193                         |
| 99                   | 1  | <i>Pbca</i>                                          | 11.503          | 11.711 | 13.043 | 90  | 90     | 90  | -102.52                                     | 7.79                                         | 1.196                         |
| 159                  | 1  | <i>P2</i> <sub>1</sub> / <i>c</i>                    | 12.977          | 5.465  | 12.676 | 90  | 72.56  | 90  | -102.36                                     | 7.95                                         | 1.225                         |
| 224                  | 1  | <i>C2/c</i>                                          | 27.324          | 4.926  | 12.744 | 90  | 83.53  | 90  | -102.32                                     | 7.99                                         | 1.233                         |
| 1019                 | 1  | <i>Pna2</i> <sub>1</sub>                             | 12.392          | 17.066 | 4.109  | 90  | 90     | 90  | -102.04                                     | 8.26                                         | 1.209                         |
| 91                   | 1  | <i>Fdd2</i>                                          | 35.744          | 24.829 | 4.056  | 90  | 90     | 90  | -102.02                                     | 8.29                                         | 1.168                         |
| 22                   | 1  | <i>P2</i> <sub>1</sub> / <i>c</i>                    | 4.311           | 16.578 | 12.384 | 90  | 82.00  | 90  | -102.01                                     | 8.29                                         | 1.199                         |
| 570                  | 1  | <i>Cc</i>                                            | 13.548          | 6.114  | 13.066 | 90  | 125.12 | 90  | -102.01                                     | 8.29                                         | 1.187                         |
| 228                  | 1  | <i>P2</i> <sub>1</sub> / <i>c</i>                    | 13.859          | 4.876  | 12.816 | 90  | 92.77  | 90  | -102.01                                     | 8.30                                         | 1.215                         |
| 162                  | 2  | <i>R</i> $\bar{3}$                                   | 31.224          | 31.224 | 9.953  | 90  | 90     | 120 | -101.92                                     | 8.39                                         | 1.125                         |
| 139                  | 1  | <i>C2/c</i>                                          | 16.335          | 11.456 | 12.218 | 90  | 51.64  | 90  | -101.90                                     | 8.40                                         | 1.172                         |
| 162                  | 1  | <i>Pccn</i>                                          | 16.931          | 7.950  | 12.790 | 90  | 90     | 90  | -101.88                                     | 8.43                                         | 1.221                         |
| 317                  | 1  | <i>P2</i> <sub>1</sub> 2 <sub>1</sub> 2 <sub>1</sub> | 4.480           | 12.869 | 14.042 | 90  | 90     | 90  | -101.85                                     | 8.46                                         | 1.298                         |
| 134                  | 1  | <i>P2</i> <sub>1</sub> / <i>c</i>                    | 13.321          | 5.186  | 12.565 | 90  | 90     | 90  | -101.71                                     | 8.59                                         | 1.292                         |
| 127                  | 1  | <i>Pna2</i> <sub>1</sub>                             | 10.812          | 10.931 | 7.270  | 90  | 90     | 90  | -101.71                                     | 8.60                                         | 1.223                         |

| Str. ID <sup>a</sup> | Z' | Space group                  | Cell parameters |        |        |     |        |     | E <sub>latt</sub> /<br>kJ mol <sup>-1</sup> | ΔE <sub>latt</sub> /<br>kJ mol <sup>-1</sup> | Density<br>g cm <sup>-3</sup> |
|----------------------|----|------------------------------|-----------------|--------|--------|-----|--------|-----|---------------------------------------------|----------------------------------------------|-------------------------------|
|                      |    |                              | a/Å             | b/Å    | c/Å    | α/° | β/°    | γ/° |                                             |                                              |                               |
| 685                  | 1  | <i>P2<sub>1</sub>/c</i>      | 8.470           | 9.794  | 10.645 | 90  | 77.79  | 90  | -101.59                                     | 8.72                                         | 1.217                         |
| 135                  | 1  | <i>Pna2<sub>1</sub></i>      | 13.350          | 13.926 | 4.658  | 90  | 90     | 90  | -101.58                                     | 8.72                                         | 1.213                         |
| 282                  | 1  | <i>P2<sub>1</sub>/c</i>      | 10.104          | 9.161  | 9.731  | 90  | 77.31  | 90  | -101.51                                     | 8.80                                         | 1.196                         |
| 9 (II)               | 2  | <i>R<math>\bar{3}</math></i> | 28.002          | 28.002 | 12.281 | 90  | 90     | 120 | -101.49                                     | 8.82                                         | 1.134                         |
| 142                  | 1  | <i>Pccn</i>                  | 8.052           | 16.899 | 12.766 | 90  | 90     | 90  | -101.48                                     | 8.83                                         | 1.210                         |
| 88                   | 1  | <i>Fdd2</i>                  | 24.814          | 35.289 | 4.028  | 90  | 90     | 90  | -101.41                                     | 8.90                                         | 1.192                         |
| 80                   | 1  | <i>P2<sub>1</sub>/c</i>      | 11.903          | 6.289  | 12.120 | 90  | 110.01 | 90  | -101.40                                     | 8.90                                         | 1.233                         |
| 1224                 | 1  | <i>Pna2<sub>1</sub></i>      | 12.980          | 6.303  | 10.821 | 90  | 90     | 90  | -101.17                                     | 9.14                                         | 1.187                         |
| 24                   | 1  | <i>Pca2<sub>1</sub></i>      | 15.538          | 4.675  | 11.856 | 90  | 90     | 90  | -101.04                                     | 9.27                                         | 1.220                         |
| 73                   | 1  | <i>P2<sub>1</sub>/c</i>      | 5.873           | 12.644 | 11.962 | 90  | 76.06  | 90  | -101.04                                     | 9.27                                         | 1.219                         |
| 472                  | 1  | <i>C2/c</i>                  | 21.508          | 6.695  | 12.891 | 90  | 109.97 | 90  | -100.94                                     | 9.36                                         | 1.205                         |
| 97                   | 1  | <i>Pca2<sub>1</sub></i>      | 13.397          | 4.995  | 13.174 | 90  | 90     | 90  | -100.89                                     | 9.42                                         | 1.192                         |
| 356                  | 1  | <i>Fdd2</i>                  | 5.671           | 25.418 | 24.421 | 90  | 90     | 90  | -100.80                                     | 9.51                                         | 1.194                         |
| 1113                 | 1  | <i>Fdd2</i>                  | 29.223          | 25.543 | 4.718  | 90  | 90     | 90  | -100.65                                     | 9.65                                         | 1.194                         |
| 2505                 | 1  | <i>Pna2<sub>1</sub></i>      | 13.321          | 5.186  | 12.565 | 90  | 90     | 90  | -100.63                                     | 9.67                                         | 1.211                         |
| 1487                 | 1  | <i>P2<sub>1</sub></i>        | 13.840          | 4.902  | 8.209  | 90  | 48.52  | 90  | -100.50                                     | 9.81                                         | 1.259                         |
| 561                  | 1  | <i>Cc</i>                    | 28.838          | 4.983  | 12.834 | 90  | 67.40  | 90  | -100.49                                     | 9.81                                         | 1.185                         |
| 150                  | 1  | <i>Pbcn</i>                  | 14.673          | 12.995 | 9.201  | 90  | 90     | 90  | -100.38                                     | 9.92                                         | 1.198                         |
| 133                  | 1  | <i>Pna2<sub>1</sub></i>      | 13.100          | 6.014  | 11.284 | 90  | 90     | 90  | -100.32                                     | 9.99                                         | 1.182                         |

<sup>a</sup>Structure ID corresponds to the CrystalPredictor ranking. I – AH I°, II – AH II, III – AH III.

**Table S6.** Hypothetical and known low-energy crystal structures of **4-AQ (PBE-TS and PBE-G06, Fig. 8)**.

| Str. ID <sup>a</sup> | exptl. | Space group                    | Cell parameters |        |        | PBE-TS <sup>b</sup> |               |                | PBE-G06 <sup>c</sup>                      |                                                  |                                           | PI <sup>d</sup> /<br>% | Void Space <sup>e</sup><br>(%/Å <sup>3</sup> ) |                                                  |
|----------------------|--------|--------------------------------|-----------------|--------|--------|---------------------|---------------|----------------|-------------------------------------------|--------------------------------------------------|-------------------------------------------|------------------------|------------------------------------------------|--------------------------------------------------|
|                      |        |                                | a/Å             | b/Å    | c/Å    | $\alpha^\circ$      | $\beta^\circ$ | $\gamma^\circ$ | $E_{\text{lat}}/$<br>kJ mol <sup>-1</sup> | $\Delta E_{\text{lat}}/$<br>kJ mol <sup>-1</sup> | $E_{\text{lat}}/$<br>kJ mol <sup>-1</sup> |                        |                                                | $\Delta E_{\text{lat}}/$<br>kJ mol <sup>-1</sup> |
| 1_160                | I      | <i>P2<sub>1</sub>/c</i>        | 5.058           | 12.090 | 12.992 | 90                  | 97.97         | 90             | -154.93                                   | 0.00                                             | -132.18                                   | 0.00                   | 75.6                                           | 0/0                                              |
| 2_9                  | II     | <i>R<math>\bar{3}</math></i>   | 27.996          | 27.996 | 11.640 | 90                  | 90            | 120            | -144.83                                   | 10.09                                            | -129.00                                   | 3.18                   | 67.4                                           | 6.3/499.38                                       |
| 3_640                |        | <i>P2<sub>1</sub>/c</i>        | 9.996           | 9.390  | 12.974 | 90                  | 99.42         | 90             | -145.74                                   | 9.19                                             | -128.18                                   | 4.00                   | 72.6                                           | 2.3/0.1                                          |
| 4_10                 | III    | <i>R<math>\bar{3}</math></i>   | 31.265          | 31.265 | 4.425  | 90                  | 90            | 120            | -149.83                                   | 5.10                                             | -127.35                                   | 4.83                   | 71.5                                           | 7.2/271.09                                       |
| 5_157                |        | <i>P2<sub>1</sub>/n</i>        | 4.677           | 14.017 | 12.268 | 90                  | 94.88         | 90             | -148.83                                   | 6.10                                             | -126.96                                   | 5.22                   | 74.3                                           | 0/0                                              |
| 6_16                 |        | <i>Pna2<sub>1</sub></i>        | 16.724          | 12.106 | 3.894  | 90                  | 90            | 90             | -149.27                                   | 5.65                                             | -126.77                                   | 5.41                   | 75.4                                           | 1.4/10.98                                        |
| 7_75                 |        | <i>Ic</i>                      | 5.688           | 11.248 | 12.703 | 90                  | 98.86         | 90             | -147.09                                   | 7.85                                             | -125.67                                   | 6.51                   | 73.9                                           | 0/0                                              |
| 8_152                |        | <i>Pbca</i>                    | 9.872           | 12.558 | 12.979 | 90                  | 90            | 90             | -146.95                                   | 7.98                                             | -125.62                                   | 6.55                   | 73.9                                           | 0/0                                              |
| 9_134                |        | <i>P2<sub>1</sub>/c</i>        | 3.975           | 12.119 | 15.994 | 90                  | 95.27         | 90             | -148.81                                   | 6.12                                             | -124.64                                   | 7.54                   | 77.5                                           | 0/0                                              |
| 10_8                 |        | <i>P2<sub>1</sub>/n</i>        | 4.858           | 13.834 | 12.075 | 90                  | 94.50         | 90             | -147.85                                   | 7.08                                             | -124.45                                   | 7.73                   | 73.8                                           | 0/0                                              |
| 11_2                 |        | <i>Pna2<sub>1</sub></i>        | 12.984          | 12.883 | 4.776  | 90                  | 90            | 90             | -147.91                                   | 6.10                                             | -124.32                                   | 7.86                   | 74.6                                           | 0/0                                              |
| 12_1012              |        | <i>Pbca</i>                    | 6.129           | 13.067 | 20.835 | 90                  | 90            | 90             | -141.35                                   | 13.58                                            | -124.10                                   | 8.08                   | 71.1                                           | 1.0/16.39                                        |
| 13_122               |        | <i>Pna2<sub>1</sub></i>        | 14.771          | 12.106 | 4.451  | 90                  | 90            | 90             | -145.82                                   | 9.11                                             | -123.84                                   | 8.34                   | 74.7                                           | 0/0                                              |
| 14_1026              |        | <i>P2<sub>1</sub>/c</i>        | 11.722          | 5.954  | 13.175 | 90                  | 115.89        | 90             | -142.43                                   | 12.50                                            | -123.80                                   | 8.38                   | 71.9                                           | 0/0                                              |
| 15_80                |        | <i>P2<sub>1</sub>/c</i>        | 11.509          | 6.286  | 12.089 | 90                  | 111.68        | 90             | -142.57                                   | 12.36                                            | -122.98                                   | 9.20                   | 73.1                                           | 0/0                                              |
| 16_561               |        | <i>Ic</i>                      | 9.674           | 6.572  | 13.049 | 90                  | 92.34         | 90             | -140.00                                   | 14.93                                            | -122.76                                   | 9.42                   | 71.8                                           | 0/0                                              |
| 17_98                |        | <i>P2<sub>1</sub>/c</i>        | 11.600          | 5.657  | 13.252 | 90                  | 110.38        | 90             | -142.82                                   | 12.11                                            | -122.70                                   | 9.48                   | 72.9                                           | 0/0                                              |
| 18_187               |        | <i>Pbca</i>                    | 5.616           | 13.392 | 21.988 | 90                  | 90            | 90             | -140.32                                   | 14.61                                            | -122.63                                   | 9.54                   | 71.9                                           | 0/0                                              |
| 19_35                |        | <i>Fdd<math>\bar{2}</math></i> | 24.569          | 34.794 | 3.794  | 90                  | 90            | 90             | -145.56                                   | 9.37                                             | -122.50                                   | 9.68                   | 73.5                                           | 4.4/143.17                                       |
| 20_97                |        | <i>Pca2<sub>1</sub></i>        | 12.962          | 4.773  | 13.156 | 90                  | 90            | 90             | -142.55                                   | 12.37                                            | -121.97                                   | 10.21                  | 73                                             | 0/0                                              |
| 21_137               |        | <i>Pbca</i>                    | 9.816           | 12.742 | 13.137 | 90                  | 90            | 90             | -140.96                                   | 13.97                                            | -121.88                                   | 10.30                  | 72.4                                           | 3.3/54.23                                        |
| 22_19                |        | <i>P2<sub>1</sub>/c</i>        | 3.801           | 17.414 | 12.360 | 90                  | 97.55         | 90             | -144.95                                   | 9.98                                             | -121.55                                   | 10.63                  | 73.4                                           | 4.3/39.98                                        |
| 23_472               |        | <i>I2/a</i>                    | 12.919          | 6.588  | 20.237 | 90                  | 105.18        | 90             | -139.46                                   | 15.47                                            | -121.44                                   | 10.74                  | 71.6                                           | 2.4/40.56                                        |
| 24_110               |        | <i>R<math>\bar{3}</math></i>   | 31.613          | 31.613 | 4.477  | 90                  | 90            | 120            | -140.97                                   | 13.96                                            | -121.15                                   | 11.03                  | 69.2                                           | 6.7/258.33                                       |
| 25_229               |        | <i>Pna2<sub>1</sub></i>        | 14.877          | 4.593  | 11.987 | 90                  | 90            | 90             | -141.95                                   | 12.98                                            | -120.98                                   | 11.20                  | 72.7                                           | 0/0                                              |

<sup>a</sup>Structure ID: rank PBE-G06, rank CrystalPredictor. <sup>b</sup>Structure optimised (see section 2.2.2). <sup>c</sup>Single point energies using the PBE-TS structures. I – **AH I**, II – **AH II**, III – **AH III**. <sup>d</sup>PI – Kitaigorodskii type of packing index, calculated using PLATON.<sup>10</sup> <sup>e</sup>Void space was calculated using a 1.0 Å probe radius and an approx. grid spacing of 0.1 Å and is given as % of unit cell volume and in Å<sup>3</sup>.

### 2.3 Representation of the Experimental Structures

The computational models were successful in reproducing the experimental structures (Table S7). The computationally generated low energy structures were compared using the Packing similarity tool in the Solid Form module of Mercury to determine the root mean square deviation of the non-hydrogen atoms in a cluster of 15 molecules (rmsd<sub>15</sub>).<sup>11</sup>

**Table S7.** Quality of representation of the CryOpt (CrystalOptimizer) and PBE-D anhydrate structures.

|                                                                                    | Lattice parameters (cell vectors/Å, angles/°) |          |          |          |          |          | cell volume (Å <sup>3</sup> ) | rmsd <sub>15</sub> (Å) |
|------------------------------------------------------------------------------------|-----------------------------------------------|----------|----------|----------|----------|----------|-------------------------------|------------------------|
|                                                                                    | <i>a</i>                                      | <i>b</i> | <i>c</i> | <i>α</i> | <i>β</i> | <i>γ</i> |                               |                        |
| AH I (exp.), <i>P2<sub>1</sub>/c</i> , 293 K <sup>a</sup>                          | 5.216                                         | 12.369   | 13.119   | 90       | 99.07    | 90       | 835.81                        | –                      |
| AH I (CryOpt), <i>P2<sub>1</sub>/c</i> , 0 K                                       | 5.147                                         | 12.565   | 12.977   | 90       | 97.94    | 90       | 831.20                        | 0.26                   |
| AH I (PBE-D), <i>P2<sub>1</sub>/c</i> , 0 K                                        | 5.058                                         | 12.090   | 12.992   | 90       | 97.97    | 90       | 786.80                        | 0.22                   |
| AH II (exp, melt), <i>R<math>\bar{3}</math></i> , 298 K <sup>b</sup>               | 28.422                                        | 28.422   | 11.967   | 90       | 90       | 120      | 8372.91                       | –                      |
| AH II (exp, THF), <i>R<math>\bar{3}</math></i> , 298 K <sup>b</sup>                | 28.389                                        | 28.389   | 11.946   | 90       | 90       | 120      | 8337.82                       | –                      |
| AH II (exp, 1BuOH), <i>R<math>\bar{3}</math></i> , 298 K <sup>b</sup>              | 28.449                                        | 28.449   | 11.990   | 90       | 90       | 120      | 8403.94                       | –                      |
| AH II (exp, CCl <sub>4</sub> ), <i>R<math>\bar{3}</math></i> , 298 K <sup>b</sup>  | 28.483                                        | 28.483   | 12.002   | 90       | 90       | 120      | 8432.47                       | –                      |
| AH II (exp., CCl <sub>4</sub> ), <i>R<math>\bar{3}</math></i> , 173 K <sup>a</sup> | 28.397                                        | 28.397   | 11.924   | 90       | 90       | 120      | 8327.16                       | –                      |
| AH II (CryOpt), <i>R<math>\bar{3}</math></i> , 0 K                                 | 28.002                                        | 28.002   | 12.281   | 90       | 90       | 120      | 8339.53                       | 0.32                   |
| AH II (PBE-D), <i>R<math>\bar{3}</math></i> , 0 K                                  | 27.996                                        | 27.996   | 11.640   | 90       | 90       | 120      | 7900.87                       | 0.19                   |
| AH III (exp), <i>R<math>\bar{3}</math></i> , 298 K <sup>b</sup>                    | 31.511                                        | 31.511   | 4.666    | 90       | 90       | 120      | 4012.35                       | –                      |
| AH III (CryOpt), <i>R<math>\bar{3}</math></i> , 0 K                                | 31.556                                        | 31.556   | 4.544    | 90       | 90       | 120      | 3918.61                       | –                      |
| AH III (PBE-D), <i>R<math>\bar{3}</math></i> , 0 K                                 | 31.265                                        | 31.265   | 4.425    | 90       | 90       | 120      | 3745.93                       | –                      |

<sup>a</sup>Single crystal structure, <sup>b</sup>lattice parameters derived from Pawley fits.

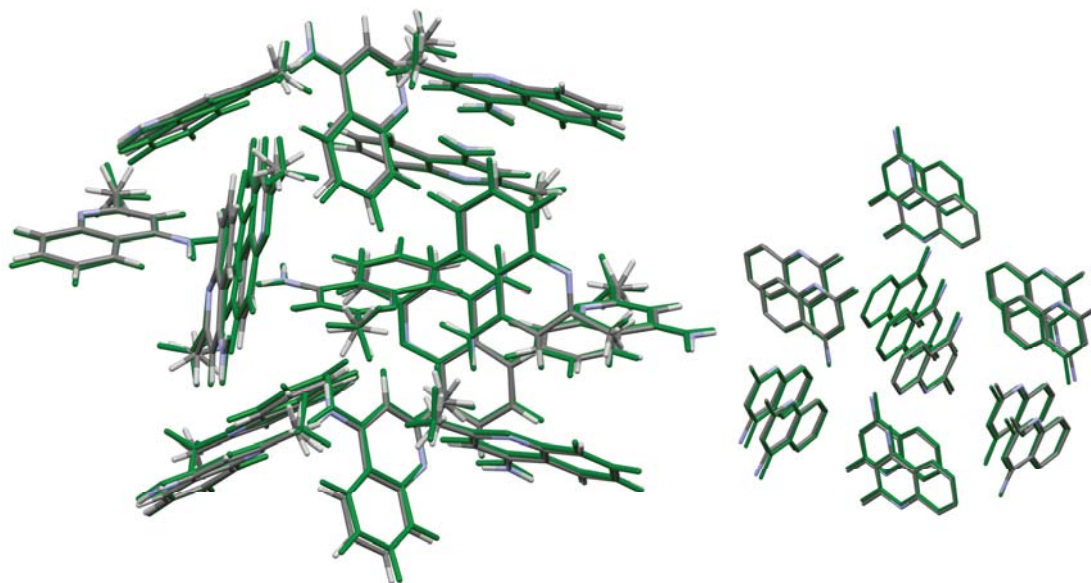

**Figure S12.** Overlay of the 15 molecule cluster of the observed structure of **AH I**<sup>o</sup> (coloured by element) and calculated PBE-D structure (green), rmsd<sub>15</sub>=0.22 Å; left: including protons, right: without protons.

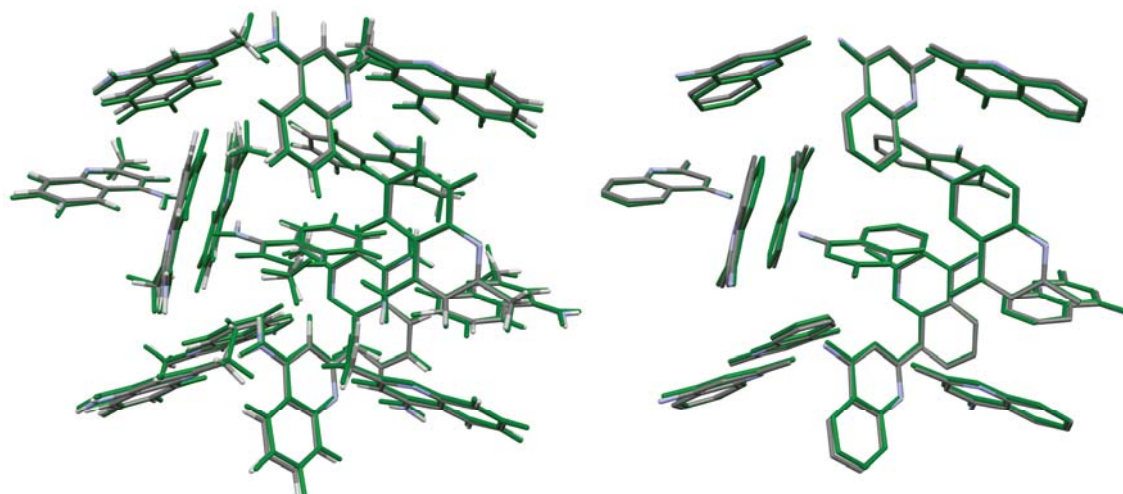

**Figure S13.** Overlay of the 15 molecule cluster of the observed structure of **AH II** (coloured by element) and calculated PBE-D structure (green), rmsd<sub>15</sub>=0.19 Å; left: including protons, right: without protons.

## 2.4 PIXEL Calculations

PIXEL energies are intermolecular energies (i.e.  $U_{\text{inter}}$ ) derived by integration over the isolated molecule charge densities placed in the crystal structures. The electrostatic contribution  $E_C$  is rigorously derived by this procedure and various approximations are used to estimate the polarisation (induction)  $E_P$ , dispersion  $E_D$ , and repulsion  $E_R$  contribution to the intermolecular lattice energy. The calculations also provide an approximate breakdown into contributions from different pairs of molecules in the coordination shell.

It has to be noted that the non-additivity of the molecule...molecule polarisation energies could not be taken into account for calculating the dimeric energies given in Table S8. This error was estimated by considering the lattice energies obtained by summing the molecule...molecule pairwise energies. These energies differ from the PIXEL lattice energies when the polarisation is calculated from the net field (i.e. accounting for non-additivity of the electrostatic field around a molecule) by approximately a max.  $\pm 2.5\%$  error in lattice energy. Thus the neglect of non-additivity and distant interactions does not qualitatively affect the results in the m/s.

**Table S8.** PIXEL calculations on **4-AQ** lowest energy structures (**AH I<sup>o</sup>**, **AH II**, **3**, **AH III**, **5** and **6**). Only the most relevant intermolecular interactions for pairs of molecules are listed.

| Structure                                          | Interaction <sup>a</sup> | $\text{kJ mol}^{-1}$ |         |         |         |                      |
|----------------------------------------------------|--------------------------|----------------------|---------|---------|---------|----------------------|
|                                                    |                          | $E_C^b$              | $E_P^c$ | $E_D^d$ | $E_R^e$ | $U_{\text{inter}}^f$ |
| <b>AH I<sup>o</sup></b><br><i>P2<sub>1</sub>/c</i> | N-H...N (6.497)          | -62.5                | -29.4   | -31.4   | 76.4    | -46.9                |
|                                                    | $\pi$ ... $\pi$ (5.058)  | -0.2                 | -3.7    | -32.5   | 19.0    | -17.4                |
|                                                    | C-H... $\pi$ (6.789)     | -9.7                 | -4.8    | -19.7   | 17.6    | -16.6                |
| <b>AH II</b><br><i>R<math>\bar{3}</math></i>       | N-H...N (6.319)          | -57.6                | -24.9   | -31.2   | 67.4    | -49.0                |
|                                                    | N-H...N (6.112)          | -68.5                | -31.9   | -35.1   | 86.8    | -48.7                |
|                                                    | N-H...N (5.507)          | -35.0                | -17.1   | -34.8   | 47.4    | -39.5                |
|                                                    | C-H... $\pi$ (5.783)     | -12.7                | -10.7   | -30.9   | 30.0    | -24.3                |
|                                                    | C-H... $\pi$ (5.885)     | -9.4                 | -5.9    | -29.3   | 29.7    | -14.9                |
| <b>3</b><br><i>P2<sub>1</sub>/c</i>                | N-H...N (6.490)          | -65.0                | -30.0   | -35.6   | 84.9    | -45.9                |
|                                                    | C-H... $\pi$ (7.405)     | -5.2                 | -2.2    | -11.1   | 2.7     | -15.9                |
| <b>AH III</b><br><i>R<math>\bar{3}</math></i>      | N-H...N (6.681)          | -63.0                | -29.3   | -31.9   | 80.5    | -43.7                |
|                                                    | $\pi$ ... $\pi$ (4.425)  | -2.9                 | -5.7    | -45.3   | 33.0    | -20.8                |
| <b>5</b><br><i>P2<sub>1</sub>/n</i>                | N-H...N (6.380)          | -74.0                | -36.1   | -38.3   | 104.4   | -43.9                |
|                                                    | $\pi$ ... $\pi$ (4.677)  | -3.6                 | -6.5    | -41.7   | 34.2    | -17.7                |
| <b>6</b><br><i>Pna2<sub>1</sub></i>                | N-H...N (6.844)          | -56.1                | -25.3   | -27.3   | 70.2    | -38.5                |
|                                                    | $\pi$ ... $\pi$ (3.894)  | -5.2                 | -8.8    | -50.4   | 45.1    | -19.2                |
|                                                    | N/C-H...C (6.741)        | -9.7                 | -5.9    | -21.9   | 21.6    | -15.9                |

<sup>a</sup>PIXEL energies are for a pair of molecules. The pairs of molecules are defined by the strongest intermolecular interaction and distance between their centres of mass in Å; <sup>b</sup>electrostatic (Coulombic) energy; <sup>c</sup>polarisation energy; <sup>d</sup>dispersion energy; <sup>e</sup>repulsion energy; <sup>f</sup>total intermolecular energy:  $U_{\text{inter}} = E_C + E_P + E_D + E_R$ . The non-additivity of  $E_P$  is not included.

## 2.5 Hirshfeld Surfaces

For the generation of the Hirshfeld 2D fingerprint plots the structures on Fig. 8 were used as input files.

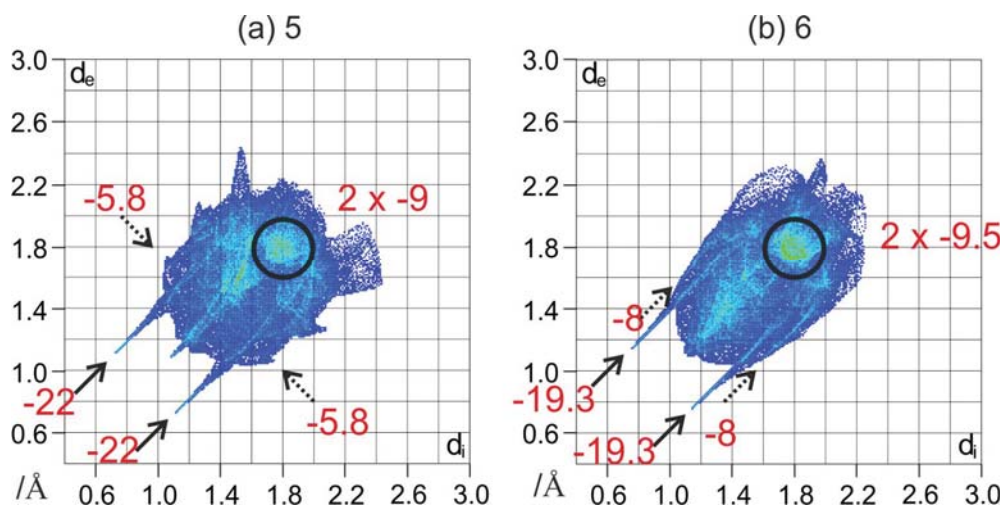

**Figure S14.** 2D Fingerprint plots derived from Hirshfeld surfaces<sup>12,13</sup> of (a) **5** and (b) **6** (Fig. 8). Red numbers correspond to PIXEL<sup>14-16</sup> energies of the strongest intermolecular interactions (Table S8), with N–H $\cdots$ N hydrogen bonds indicated with solid arrows, C–H $\cdots$  $\pi$  or N/C–H $\cdots$ C short contacts with dotted arrows and the regions of  $\pi\cdots\pi$  interactions are encircled.

## 2.6 Computationally Generated AH III Structure

The .res file for the calculated AH III is given below.

```
TITL A4_10
CELL 1.54180 31.2646 31.2646 4.4247 90.000 90.000 120.000
ZERR 18 0.0000 0.0000 0.0000 0.000 0.000 0.000
LATT 3
SYMM - Y, X - Y, Z
SYMM - X + Y, - X, Z
SFAC C H N
UNIT 180 180 36
C1 1 0.14411 0.17077 -0.13796 11.00000 0.0500
C2 1 0.17663 0.15434 -0.05498 11.00000 0.0500
C3 1 0.21463 0.18079 0.15146 11.00000 0.0500
C4 1 0.21969 0.22603 0.26703 11.00000 0.0500
C5 1 0.25683 0.25672 0.47331 11.00000 0.0500
C6 1 0.25919 0.29887 0.58671 11.00000 0.0500
C7 1 0.22436 0.31218 0.49352 11.00000 0.0500
C8 1 0.18845 0.28357 0.28647 11.00000 0.0500
C9 1 0.18485 0.23981 0.16919 11.00000 0.0500
C10 1 0.10192 0.14045 -0.34787 11.00000 0.0500
H1 2 0.23603 0.12783 0.17265 11.00000 -1.20000
H2 2 0.26842 0.17970 0.41454 11.00000 -1.20000
H3 2 0.17234 0.12036 -0.15081 11.00000 -1.20000
H4 2 0.28422 0.24722 0.54804 11.00000 -1.20000
H5 2 0.28759 0.32157 0.75042 11.00000 -1.20000
H6 2 0.22598 0.34511 0.58971 11.00000 -1.20000
H7 2 0.16157 0.29356 0.20756 11.00000 -1.20000
H8 2 0.06958 0.11280 -0.22033 11.00000 -1.50000
H9 2 0.11164 0.12076 -0.51436 11.00000 -1.50000
H10 2 0.09089 0.16408 -0.46733 11.00000 -1.50000
N1 3 0.24564 0.16411 0.23342 11.00000 0.0500
N2 3 0.14760 0.21250 -0.03091 11.00000 0.0500
```

END



## Reference List

1. Markvardsen, A. J.; David, W. I. F.; Johnson, J. C.; Shankland, K. *Acta Crystallogr. , Sect. A* **2001**, *57*, 47-54.
2. David, W. I. F.; Shankland, K.; van de Streek, J.; Pidcock, E.; Motherwell, W. D. S.; Cole, J. C. *J. Appl. Crystallogr.* **2006**, *39*, 910-915.
3. Pawley, G. S. *J. Appl. Crystallogr.* **1981**, *14*, 357-361.
4. Tai, X. S.; Xu, J.; Feng, Y. M.; Liang, Z. P. *Acta Crystallogr. , Sect. E: Struct. Rep. Online* **2008**, *64*, o1026, o1026-1-o1026, o1026-6.
5. Clark, S. J.; Segall, M. D.; Pickard, C. J.; Hasnip, P. J.; Probert, M. J.; Refson, K.; Payne, M. C. *Z. Kristallogr.* **2005**, *220*, 567-570.
6. Perdew, J. P.; Burke, K.; Ernzerhof, M. *Phys. Rev. Lett.* **1996**, *77*, 3865-3868.
7. Vanderbilt, D. *Phys. Rev. B* **1990**, *41*, 7892-7895.
8. Tkatchenko, A.; Scheffler, M. *Phys. Rev. Lett.* **2009**, *102*, 073005-1-073005/4.
9. Grimme, S. *J. Comput. Chem.* **2006**, *27*, 1787-1799.
10. Spek, A. L. *Acta Crystallographica Section D* **2009**, *65*, 148-155.
11. Chisholm, J. A.; Motherwell, S. *J. Appl. Crystallogr.* **2005**, *38*, 228-231.
12. Spackman, M. A.; Jayatilaka, D. *CrystEngComm* **2009**, *11*, 19-32.
13. *CrystalExplorer*, version 3.1; Wolff, S. K.; Grimwood, D. J.; McKinnon, J. J.; Turner, M. J.; Jayatilaka, D.; Spackman, M. A. University of Western Australia: Perth: **2012**
14. Gavezzotti, A. *New J. Chem.* **2011**, *35*, 1360-1368.
15. Gavezzotti, A. *J. Phys. Chem. B* **2002**, *106*, 4145-4154.
16. Gavezzotti, A. *J. Phys. Chem. B* **2003**, *107*, 2344-2353.
